# Supplementary material
Source: Research Square preprint supplement (doi:10.21203/rs.3.rs-9135348/v1)
Supplement: Supplementary file 1 [file 5b8da63330457b0a041a6282.docx]

**Supplementary file 1.** Heteroduplex-based genotyping of *mstnb1*-null and WT rainbow trout. A, B, and C indicates WT fish. D, E, and F indicates mutant fish. The marker size was 3000 bp.

**
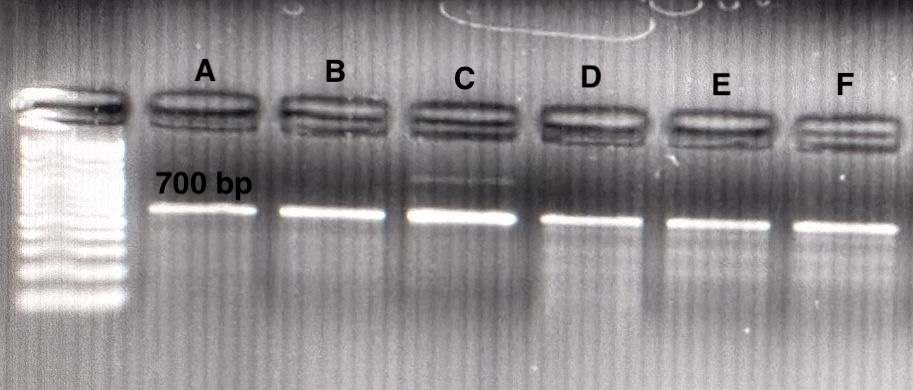
**
